# Supplementary material for: „Berliner Inventar zur Angehörigenbelastung – Demenz Praxisversion (BIZA-D-PV)“ auch für den nicht demenziellen Bereich?
Source: Atypon-hosted journal article supplement (doi:10.1026/0012-1924/a000221), 2019-02-01
Supplement: 0012-1924_a000221_esm2.pdf [file 0012-1924_a000221_esm2.pdf]

Elektronisches Supplement 2. Korrelationen für die Nicht-Demenz-Gruppe ( $n = 166$ , Zeile 1) und der Demenz-Gruppe ( $n = 133$ , Zeile 2)

|                                                     | 1            | 2            | 3            | 4            | 5     | 6            | 7            | 8            |
|-----------------------------------------------------|--------------|--------------|--------------|--------------|-------|--------------|--------------|--------------|
| 1 Praktische Betreuungsaufgaben                     |              | <b>-.097</b> | <b>.035</b>  | .106         | .078  | .125         | .132         | .102         |
|                                                     |              | <b>.190</b>  | <b>.273</b>  | -.003        | -.010 | .082         | .264         | .042         |
| 2 Belastung durch kognitive Einbußen                | <b>-.057</b> |              | .529         | <b>.182</b>  | .174  | -.299        | <b>.358</b>  | <b>.280</b>  |
|                                                     | <b>.154</b>  |              | .428         | <b>-.094</b> | .088  | -.103        | <b>.093</b>  | <b>.042</b>  |
| 3 Belastung durch Verhaltensstörungen               | <b>.007</b>  | .575         |              | <b>.231</b>  | .182  | <b>-.403</b> | .255         | <b>.351</b>  |
|                                                     | <b>.283</b>  | .432         |              | <b>.001</b>  | .154  | <b>-.186</b> | .086         | <b>.144</b>  |
| 4 Mangelnde soziale Anerkennung                     | .110         | <b>.258</b>  | <b>.284</b>  |              | .383  | -.289        | .379         | .434         |
|                                                     | .042         | <b>-.066</b> | <b>.065</b>  |              | .371  | -.237        | .365         | .318         |
| 5 Mangelnde institutionelle Unterstützung           | -.037        | .228         | .237         | .401         |       | -.211        | .354         | .397         |
|                                                     | -.044        | .099         | .165         | .398         |       | -.170        | .350         | .298         |
| 6 Akzeptanz der Pflegesituation                     | .163         | <b>-.345</b> | <b>-.429</b> | -.328        | -.297 |              | -.309        | -.491        |
|                                                     | .127         | <b>-.076</b> | <b>-.157</b> | -.210        | -.178 |              | -.191        | -.376        |
| 7 Persönliche Einschränkungen                       | .147         | <b>.413</b>  | .298         | .425         | .395  | -.366        |              | .565         |
|                                                     | .289         | <b>.072</b>  | .152         | .406         | .366  | -.229        |              | .489         |
| 8 Depressivität                                     | .136         | <b>.339</b>  | <b>.372</b>  | .472         | .392  | -.519        | .592         |              |
|                                                     | .074         | <b>.007</b>  | <b>.143</b>  | .311         | .270  | -.423        | .525         |              |
| Pflegestufe<br>(0 = 0/I, 1 = II/III)                | .276         | <b>.115</b>  | .040         | .119         | .034  | <b>-.083</b> | .242         | .181         |
|                                                     | .217         | <b>-.092</b> | .091         | .153         | .100  | <b>.132</b>  | .189         | .036         |
| Geschlecht pflegende Person<br>(0 = Frau, 1 = Mann) | .087         | -.060        | -.110        | .048         | -.033 | .138         | -.058        | -.073        |
|                                                     | .034         | .072         | -.070        | .036         | .051  | .223         | -.161        | -.212        |
| Alter pflegende Person                              | .392         | -.108        | -.163        | -.053        | -.340 | .250         | -.145        | -.018        |
|                                                     | .209         | -.052        | -.063        | -.028        | -.167 | .072         | -.064        | .062         |
| Bildung<br>(0 = gering <sup>a</sup> , 1 = hoch)     | -.146        | .089         | .127         | -.006        | .190  | -.068        | .096         | -.034        |
|                                                     | -.177        | .027         | .086         | -.190        | .072  | .077         | -.052        | -.071        |
| Berufstätig<br>(0 = nein, 1 = ja)                   | -.391        | <b>.244</b>  | <b>.283</b>  | .057         | .290  | <b>-.265</b> | .143         | .023         |
|                                                     | -.372        | <b>.033</b>  | <b>.000</b>  | .143         | .214  | <b>-.058</b> | -.005        | -.071        |
| Partnerpflege<br>(0 = nein, 1 = ja)                 | <b>.599</b>  | <b>-.209</b> | <b>-.115</b> | .082         | -.107 | <b>.599</b>  | <b>-.209</b> | <b>-.115</b> |
|                                                     | <b>.388</b>  | <b>.013</b>  | <b>.117</b>  | .042         | -.078 | <b>.388</b>  | <b>.013</b>  | <b>.117</b>  |
| Gemeinsamer Haushalt<br>(0 = nein, 1 = ja)          | .598         | -.127        | -.003        | .132         | -.031 | .598         | -.127        | -.003        |
|                                                     | .524         | .009         | .112         | .163         | -.079 | .524         | .009         | .112         |
| Betreuungsdauer                                     | .178         | .021         | -.025        | .121         | .026  | .178         | .021         | -.025        |
|                                                     | .158         | .084         | .099         | .015         | .102  | .158         | .084         | .099         |
| Pflegekurs<br>(0 = nein, 1 = ja)                    | .042         | .067         | .001         | .048         | .010  | .042         | .067         | .001         |
|                                                     | .089         | .011         | .057         | .025         | -.051 | .089         | .011         | .057         |
| Pflegeumfang                                        | .476         | -.007        | <b>.027</b>  | <b>.267</b>  | .094  | -.010        | .210         | <b>.337</b>  |
|                                                     | .553         | .099         | <b>.263</b>  | <b>.011</b>  | .151  | .079         | .252         | <b>.118</b>  |
| Zunahme Stressoren Pflege<br>(0 = nein, 1 = ja)     | .086         | <b>.245</b>  | .236         | .253         | .149  | .086         | <b>.245</b>  | .236         |
|                                                     | -.069        | <b>.037</b>  | .123         | .164         | .207  | -.069        | <b>.037</b>  | .123         |
| Zunahme Stressoren extern<br>(0 = nein, 1 = ja)     | .068         | .175         | .148         | .227         | .194  | .068         | .175         | .148         |
|                                                     | -.078        | -.022        | .146         | .210         | .282  | -.078        | -.022        | .146         |

Anmerkungen: Korrelationen nach Pearson; Werte oberhalb der Diagonalen sind Partialkorrelationen mit Geschlecht, Alter, Pflegestufe und „Zunahme Stressoren Pflege“; Fettdruck bzw. Unterstreichung für  $\Delta r \geq .2$  bzw.  $\Delta r \geq .3$ ;

<sup>a</sup> gering = kein Schulabschluss oder Haupt-/Volksschule.
