# Supplementary figures and images for: „Berliner Inventar zur Angehörigenbelastung – Demenz Praxisversion (BIZA-D-PV)“ auch für den nicht demenziellen Bereich?
Source: Atypon-hosted journal article supplement (doi:10.1026/0012-1924/a000221), 2019-02-01

Elektronisches Supplement 1. Screeplot mit Parallelanalyse

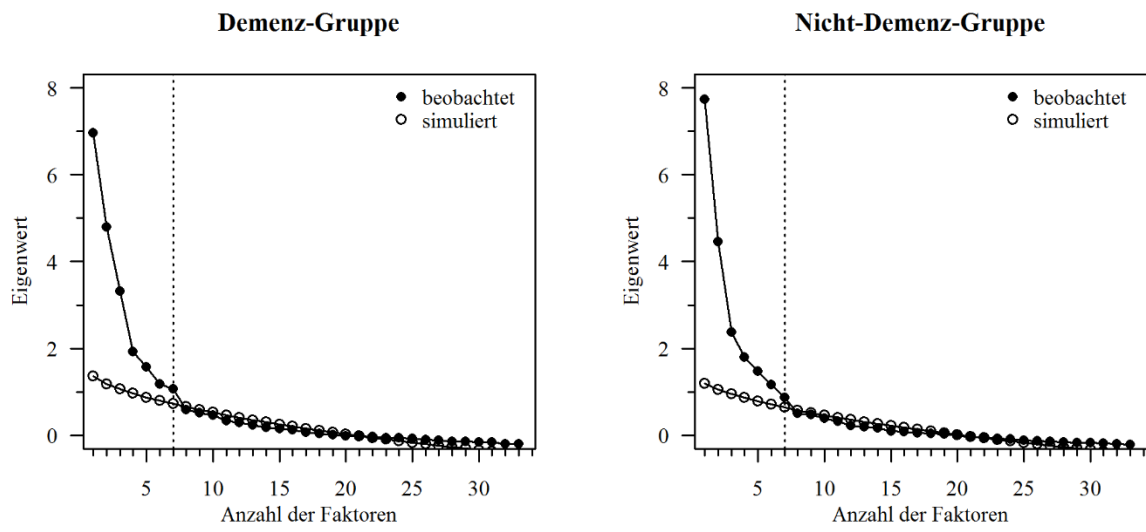

Supplement: 0012-1924_a000221_esm1.pdf [file 0012-1924_a000221_esm1.pdf]
